# Supplementary material for: Hydrogen Yield from CO2 Reforming of Methane: Impact of La2O3 Doping on Supported Ni Catalysts
Source: MDPI journal article supplement (doi:10.3390/en14092412), 2021-04-23
Supplement: s1 [file s1]

# Hydrogen yield from CO<sub>2</sub> reforming of methane: impact of La<sub>2</sub>O<sub>3</sub> doping on supported Ni catalysts

Ahmed Abasaheed <sup>1</sup>, Samsudeen Kasim <sup>1</sup>, Wasim Khan<sup>1,2,\*</sup>, Mahmud Sofiu <sup>1</sup>, Ahmed Ibrahim <sup>1</sup> and Anis Fakeeha <sup>1,3</sup> Ahmed Al-Fatesh <sup>1</sup>

<sup>1</sup>Chemical Engineering Department, College of Engineering, King Saud University, P.O. Box 800, Riyadh 11421, Saudi Arabia; abasaheed@ksu.edu.sa; sofkolajide2@gmail.com; mahmudsofiu@gmail.com; aididwthts2011@gmail.com; anishf@ksu.edu.sa; aalfatesh@ksu.edu.sa

<sup>2</sup>Department of Chemical and Process Engineering, University of Canterbury, 20 Kirkwood Avenue, Upper Riccarton, Christchurch 8041, New Zealand

<sup>3</sup>King Abdullah City for Atomic & Renewable Energy, Energy Research & Innovation Center (ERIC) in Riyadh, Riyadh 11451, Saudi Arabia

\* Correspondence: wasimkhan49@gmail.com

## S1. Catalyst testing

The DRM reactions were performed using a stainless steel fixed reactor (9.1 mm diameter and 300 mm long) operated at 1 atm. The reactor was from PID Eng. & Tech Microactivity Reference Company. A 0.1 g of the catalyst was reduced by a H<sub>2</sub> flow of 20 mL/min for 1 h at 700 °C. Then, N<sub>2</sub> admitted to the bed for 15 min to remove the physisorbed H<sub>2</sub>. In a typical test, the proportion CO<sub>2</sub>/CH<sub>4</sub>/ N<sub>2</sub> was set to 3/3/1 at 4.2 L/h, generating 42 L (h·gcat)<sup>−1</sup> of gas hourly space velocity. A conductivity detector “GC-2014 SHIMADZU” computed the compositions of the gases in and out. Afterward, N<sub>2</sub> gas was used to cool the reactor. Then, the characterization of the catalysts was performed. Finally, the reproducibility was maintained by taking the mean value of three runs. The expressions for the hydrogen yield is given as:

$$\%H_2 \text{ yield} = \frac{\text{moles of } H_2 \text{ (out)}}{2 \times \text{moles of } CH_4 \text{ (in)}} \times 100 \quad (S1)$$

## S2. Catalyst characterization

The catalysts were characterized by numerous experimental skills. The specific surface area of catalysts was computed via nitrogen (N<sub>2</sub>) physisorption at −197 °C. A Micromeritics Tristar II 3020 unit was used to obtain the surface area via standard Brunauer–Emmett–Teller (BET). X-ray diffraction of Rigaku (Miniflex), using the radiations of Cu Kα, was considered to inspect the configuration of the produced catalysts. Diffraction peaks registered in a 2θ range between 11 and 81° were used to sort the phases of the catalysts. The morphology of the used catalyst samples was examined by using a field emission scanning electron microscope (FE-SEM, model: JEOL JSM-7100 F), furnished with energy dispersive X-ray spectroscopy (EDXS) for surface elemental analysis. The Fourier transform infrared (FTIR) measurements were performed by using IR Prestige-21 SHIMADZU, spectrophotometer, Kyoto, Japan. The spectra were read in the range

400–4000  $\text{cm}^{-1}$  with 4  $\text{cm}^{-1}$  energy resolution, using KBr pellet. Temperature programmed reduction (TPR) was attained from the Micromeritics AutoChem II to assess the reducibility of the fresh catalysts, where a thermal conductivity detector (TCD) was employed to follow the  $\text{H}_2$  consumption. Temperature programmed desorption of carbon dioxide ( $\text{CO}_2$ -TPD) was acquired from automatic chemisorption equipment (Micromeritics AutoChem II 2920) with a TCD. Carbon deposition over the surface of used catalysts was measured by means of thermogravimetric analysis (TGA) in air via an EXSTAR SII TG/DTA 7300 analyzer. For assessing catalyst reducibility, the  $\text{H}_2$ -TPR measurements were carried out on Micromeritics Auto Chem II 2920 apparatus. Raman spectroscopy gave the graphitization degree and the type of carbon deposited over the spent catalysts. A laser Raman (NMR-4500) spectrometer (JASCO, Japan) was used to register the Raman spectra of the spent catalysts. An excitation beam with a 532 nm wavelength was employed. The structure of the spent samples was monitored using a transmission electron microscope “JEOL JEM-2100F”. Transmission electron microscopy (TEM) micrographs were recorded at 120 kV.

**Table S1.** Textural properties of different catalysts supported Ni catalysts: BET specific surface area ( $S_{\text{BET}}$ ), pore volume ( $P_v$ ), and pore diameter ( $D_p$ ).

| Catalyst                                                             | BET-Surface area<br>( $\text{m}^2/\text{g}$ ) | Pore Volume<br>( $\text{cm}^3/\text{g}$ ) | Pore Diameter<br>(nm) |
|----------------------------------------------------------------------|-----------------------------------------------|-------------------------------------------|-----------------------|
| 5Ni-ZrO <sub>2</sub>                                                 | 16.1                                          | 0.15                                      | 43.3                  |
| 5Ni-10La <sub>2</sub> O <sub>3</sub> -ZrO <sub>2</sub>               | 21.6                                          | 0.18                                      | 36.3                  |
| 5Ni-15La <sub>2</sub> O <sub>3</sub> -ZrO <sub>2</sub>               | 18.4                                          | 0.15                                      | 36.1                  |
| 5Ni-20La <sub>2</sub> O <sub>3</sub> -ZrO <sub>2</sub>               | 17.3                                          | 0.13                                      | 33.5                  |
| 5Ni-Al <sub>2</sub> O <sub>3</sub>                                   | 185.6                                         | 0.64                                      | 12.4                  |
| 5Ni-10La <sub>2</sub> O <sub>3</sub> -Al <sub>2</sub> O <sub>3</sub> | 161.7                                         | 0.55                                      | 12.2                  |
| 5Ni-15La <sub>2</sub> O <sub>3</sub> -Al <sub>2</sub> O <sub>3</sub> | 162.2                                         | 0.61                                      | 12.9                  |
| 5Ni-20La <sub>2</sub> O <sub>3</sub> -Al <sub>2</sub> O <sub>3</sub> | 135.0                                         | 0.50                                      | 12.2                  |

**Table S2.** The quantitative analysis of  $\text{H}_2$  consumption during  $\text{H}_2$ -TPR.

| Catalyst                                                             | Region I- $\text{H}_2$ uptake<br>( $\mu\text{mol/g}$ ) | Region II- $\text{H}_2$ uptake<br>( $\mu\text{mol/g}$ ) | Region III- $\text{H}_2$ uptake<br>( $\mu\text{mol/g}$ ) | Total- $\text{H}_2$ uptake<br>( $\mu\text{mol/g}$ ) |
|----------------------------------------------------------------------|--------------------------------------------------------|---------------------------------------------------------|----------------------------------------------------------|-----------------------------------------------------|
| 5Ni-ZrO <sub>2</sub>                                                 | 142.3                                                  | 1903.6                                                  | 38.7                                                     | 2084.6                                              |
| 5Ni-10La <sub>2</sub> O <sub>3</sub> -ZrO <sub>2</sub>               | 964                                                    | 86                                                      | 0.0                                                      | 1050                                                |
| 5Ni-15La <sub>2</sub> O <sub>3</sub> -ZrO <sub>2</sub>               | 1688.2                                                 | 0.0                                                     | 0.0                                                      | 1688.2                                              |
| 5Ni-20La <sub>2</sub> O <sub>3</sub> -ZrO <sub>2</sub>               | 2230.6                                                 | 0.0                                                     | 0.0                                                      | 2230.6                                              |
| 5Ni-Al <sub>2</sub> O <sub>3</sub>                                   | 0.0                                                    | 0.0                                                     | 1651.2                                                   | 1651.2                                              |
| 5Ni-10La <sub>2</sub> O <sub>3</sub> -Al <sub>2</sub> O <sub>3</sub> | 0.00                                                   | 0.00                                                    | 830.6                                                    | 830.6                                               |
| 5Ni-15La <sub>2</sub> O <sub>3</sub> -Al <sub>2</sub> O <sub>3</sub> | 0.00                                                   | 0.00                                                    | 1161.4                                                   | 1161.4                                              |
| 5Ni-20La <sub>2</sub> O <sub>3</sub> -Al <sub>2</sub> O <sub>3</sub> | 0.00                                                   | 0.00                                                    | 1564.6                                                   | 1564.6                                              |
